# Supplementary material for: Highly efficient CO2 capture and conversion of a microporous acylamide functionalized rht-type metal–organic framework
Source: Royal Society of Chemistry journal article supplement (doi:10.1039/d0qi00231c), 2020-01-01
Supplement: d0qi00231c1.pdf [file d0qi00231c1.pdf]

## Electronic Supporting Information

# Highly efficient CO<sub>2</sub> capture and conversion of a microporous acylamide functionalized *rht*-type metal-organic framework

Junxiong Liao,<sup>‡a</sup> Wenjiang Zeng,<sup>‡a</sup> Baishu Zheng,<sup>\*a</sup> Xiyang Cao,<sup>a</sup> Zhaoxu Wang,<sup>\*a</sup> Guanyu Wang<sup>a</sup> and Qingyuan Yang<sup>\*b</sup>

<sup>a</sup>Key Laboratory of Theoretical Organic Chemistry and Function Molecule of Ministry of Education, Hunan Provincial Key Laboratory of Controllable Preparation and Functional Application of Fine Polymers, Hunan Provincial Key Laboratory of Advanced Materials for New Energy Storage and Conversion, School of Chemistry and Chemical Engineering, Hunan University of Science and Technology, Xiangtan 411201, China. E-mail: zbaishu@163.com (B. S. Zheng); hunst\_chem@163.com (Z. X. Wang).

<sup>b</sup>State Key Laboratory of Organic-Inorganic Composites, Beijing University of Chemical Technology, Beijing 100029, China. E-mail: qyyang@mail.buct.edu.cn (Q. Y. Yang).

<sup>‡</sup> These authors contributed equally to this work.



### 3. Synthesis of di-tert-butyl 5-iodoisophthalate (3)

SOCl<sub>2</sub> (10 mL, 137.5 mmol) was added dropwise to 5-iodoisophthalic acid **2** (0.7g, 2.4 mmol) with 100 μL DMF. The mixture was refluxed overnight and then the excess SOCl<sub>2</sub> was removed under vacuum. The resulting solid was dissolved in anhydrous THF and then tBuOK (1.1 g, 9.8 mmol) in 30 mL anhydrous THF was slowly added. After stirring for 24h at room temperature, the solvent was removed under vacuum, and the residue was washed with aqueous hydrochloric acid and water, and then filtered to give di-tert-butyl 5-iodoisophthalate **3** as a pale yellow solid (0.6g, 61.9 % yield). <sup>1</sup>H NMR (500 MHz, CDCl<sub>3</sub>, δ ppm, Fig. S8a): 8.52 (s, 1H, ArH), 8.44 (s, 2H, ArH), 1.60 (m, 18H, COOtBu).

### 4. Synthesis of 3,5-di-tert-butyl 3',5'-dimethyl [1,1'-biphenyl]-3,3',5,5'-tetracarboxylate (4)

To a solution of di-tert-butyl 5-iodoisophthalate **3** (0.808 g, 2.0 mmol) in 60 mL toluene, 3,5-bis(methoxycarbonyl)phenylboronic acid (0.714 g, 3.0 mmol) in 12 mL ethanol and Na<sub>2</sub>CO<sub>3</sub> (0.74 g, 7.0 mmol) in 4 mL water were successively added, after degassed using N<sub>2</sub> for 10 min, Pd(PPh<sub>3</sub>)<sub>4</sub> (0.23 g, 0.2 mmol) was added. The resulting reaction mixture was stirred at 110 °C under N<sub>2</sub> atmosphere overnight. After removal of solvent under vacuum, the residue was dissolved in CH<sub>2</sub>Cl<sub>2</sub> and then filtered. CH<sub>2</sub>Cl<sub>2</sub> were removed under vacuum, and the crude product was purified by column chromatography on silica gel with dichloromethane as eluent to give 3,5-di-tert-butyl 3',5'-dimethyl [1,1'-biphenyl]-3,3',5,5'-tetracarboxylate **4** as a dark brown solid (0.58 g, 61.6 % yield). <sup>1</sup>H NMR (500 MHz, CDCl<sub>3</sub>, δ ppm, Fig. S8b): 8.72 (s, 1H, ArH), 8.60 (s, 1H, ArH), 8.51 (s, 2H, ArH), 8.42 (s, 2H, ArH), 6.07 (s, 6H, COOCH<sub>3</sub>), 8.51 (m, 18H, COOtBu).

### 5. Activation of HNUST-9

The solvent-exchanged HNUST-9 was prepared by immersing the as-synthesized sample in dry methanol for 48 hours to remove the non-volatile solvates (DMF and water), the extract was decanted every 8 hours and fresh methanol was replaced. The completely activated HNUST-9 sample was obtained by heating the solvent-exchanged sample at 100 °C under a dynamic high vacuum for 24 hours. During this time, the pale blue sample changed to a deep purple-blue colour (Fig. S3), indicative of the presence of open copper(II) sites. The completely-activated samples were moisture sensitive and a few minutes of exposure to air could change the sample's color back to pale blue. Anal. Calcd (Found) for [Cu<sub>3</sub>(C<sub>30</sub>H<sub>14</sub>N<sub>2</sub>O<sub>14</sub>): C, 44.10 (44.06), H 1.739 (1.81), N 3.43 (3.38). Selected IR (KBr, cm<sup>-1</sup>, Figure S4): 3416, 1652, 1620, 1559, 1370, 1276, 1106, 904, 755, 726, 692.

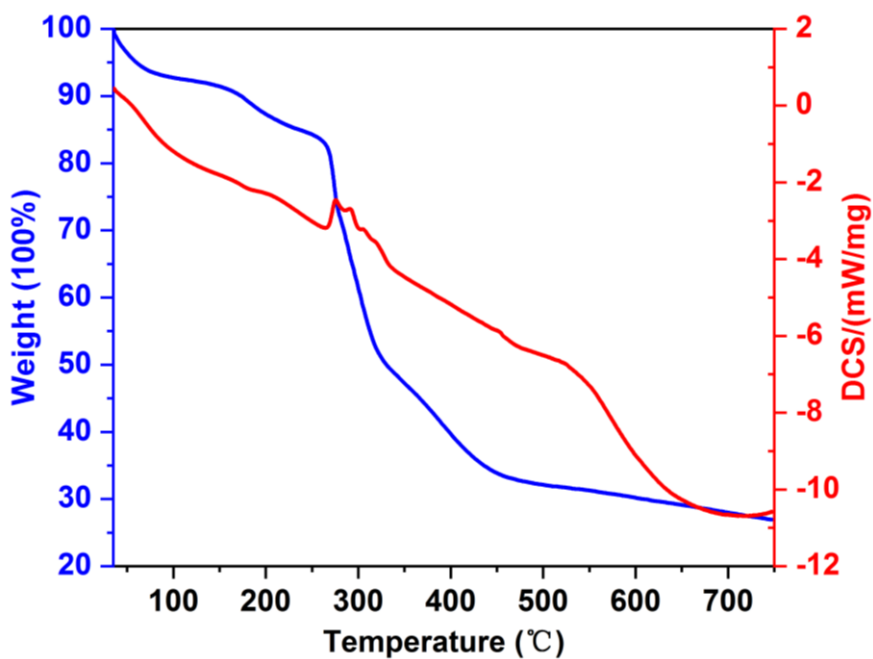

**Fig. S1** TGA data of as-synthesized HNUST-9.

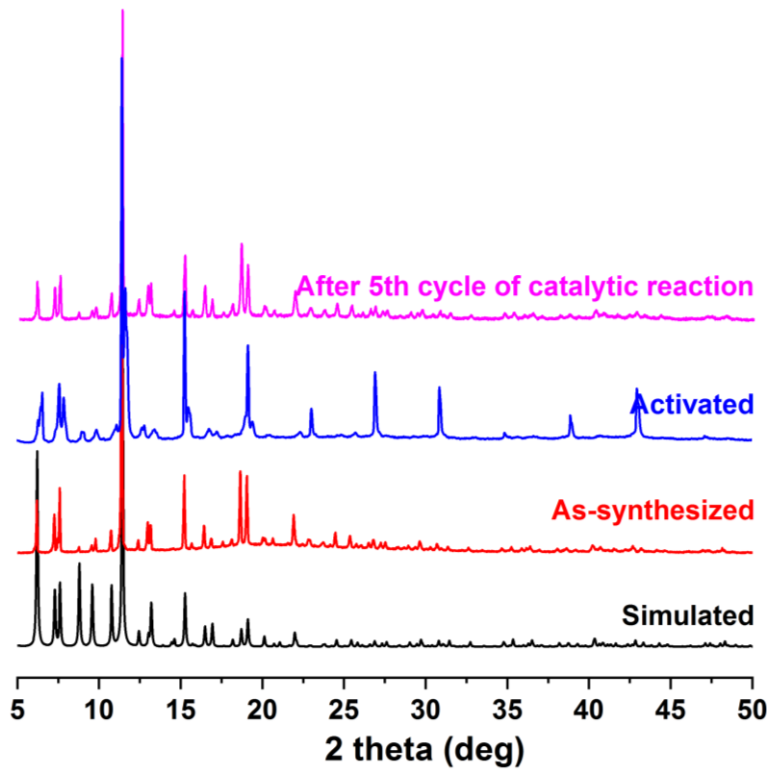

**Fig. S2** PXRD patterns of HNUST-9: simulated, as-synthesized, activated, and after the 5th cycle of catalytic reaction, respectively.

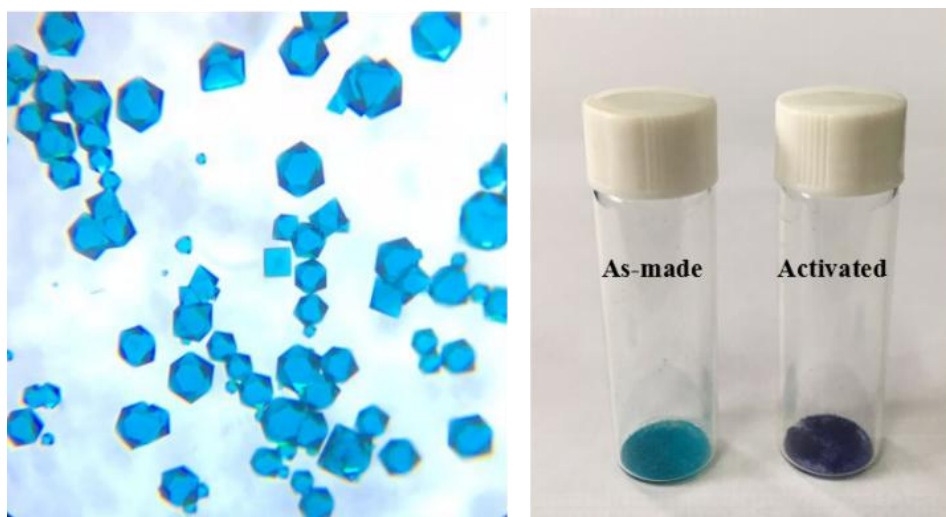

**Fig. S3** Left) Photographic image of as-synthesized HNUST-9, the crystal size has been magnified about 80 times; Right) Visual color change of HNUST-9 upon activation.

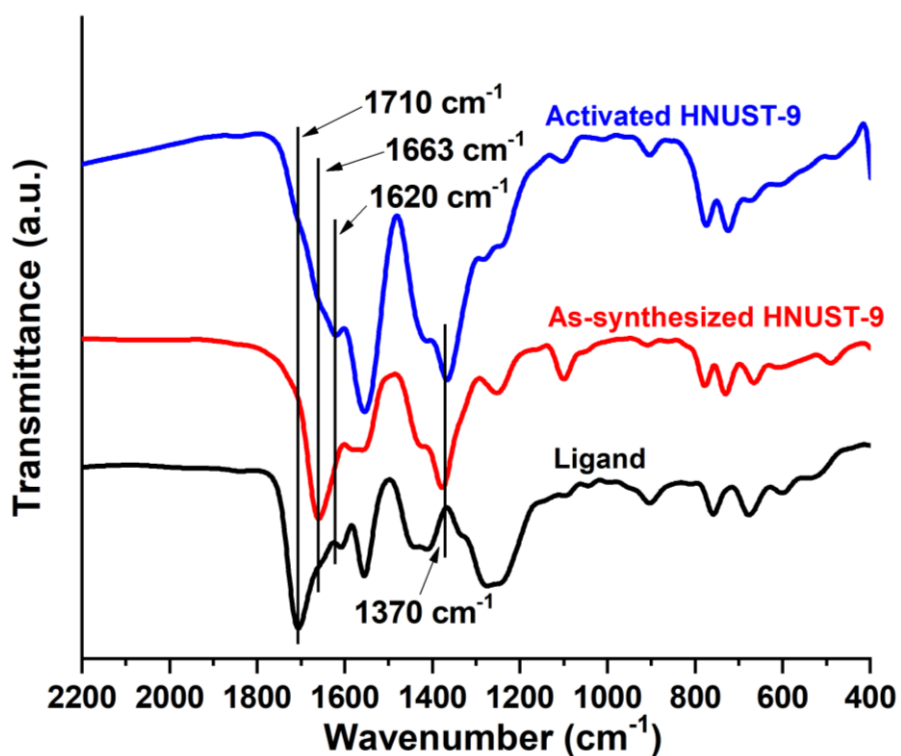

**Fig. S4** The IR spectra for HNUST-9. a) Ligand; b) As-synthesized; and c) Activated HNUST-9. Note the absence of the vibration frequencies of the solvent DMF and methanol molecules in the activated samples. The frequencies at  $1663\text{ cm}^{-1}$  attributes to the  $\nu(\text{CO})$  vibration of the DMF, and the presence of the  $\nu(\text{OH})$  stretching frequencies at  $1620\text{ cm}^{-1}$  in activated samples may result from the rapid re-adsorption of trace moisture during the IR measurements.

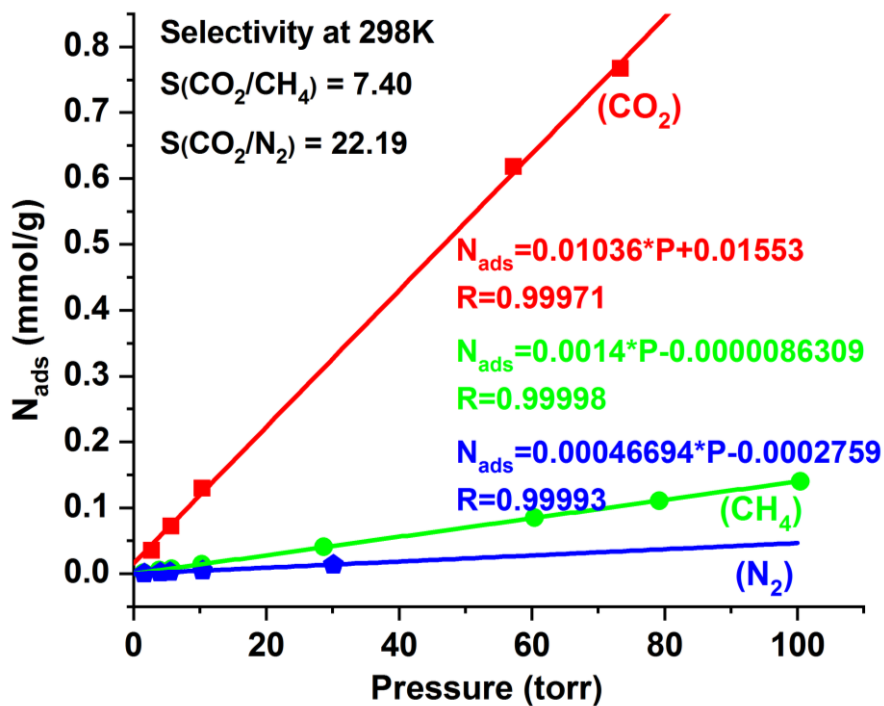

**Fig. S5** The fitting initial slope for CO<sub>2</sub>, CH<sub>4</sub> and N<sub>2</sub> isotherms for HNUST-9 collected at 298 K ( $N_{\text{ads}}$  = gases uptake; R = related coefficient). The calculated selectivity of CO<sub>2</sub>/CH<sub>4</sub> and CO<sub>2</sub>/N<sub>2</sub> for HNUST-9 is about 7.4 and 22.2, respectively.

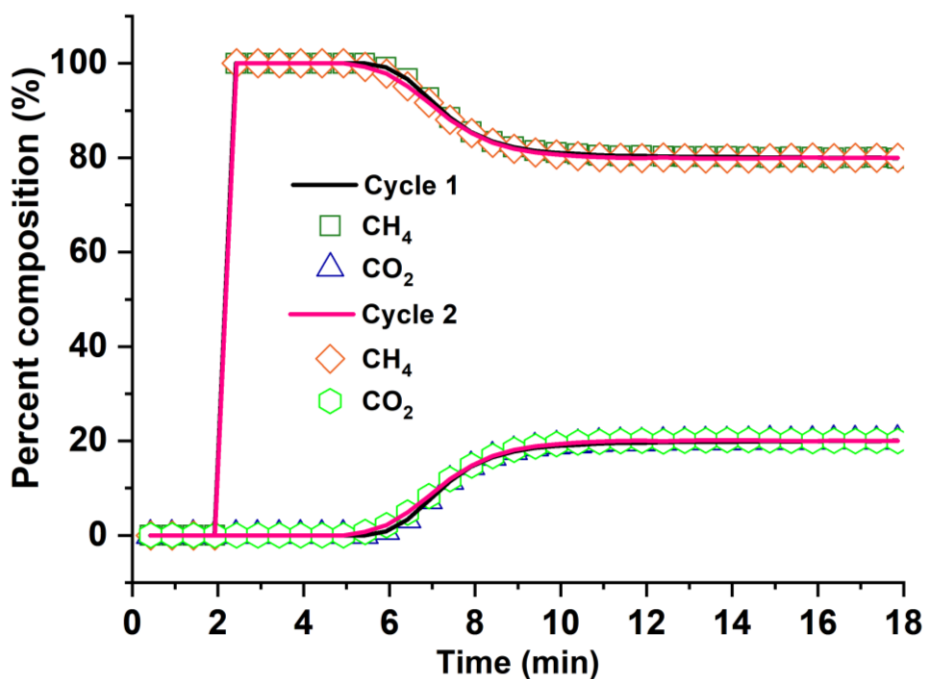

**Fig. S6** Repeated CO<sub>2</sub>/CH<sub>4</sub> breakthrough experiments of HNUST-9 after 20 min helium gas blowing at 298 K and 1 bar.

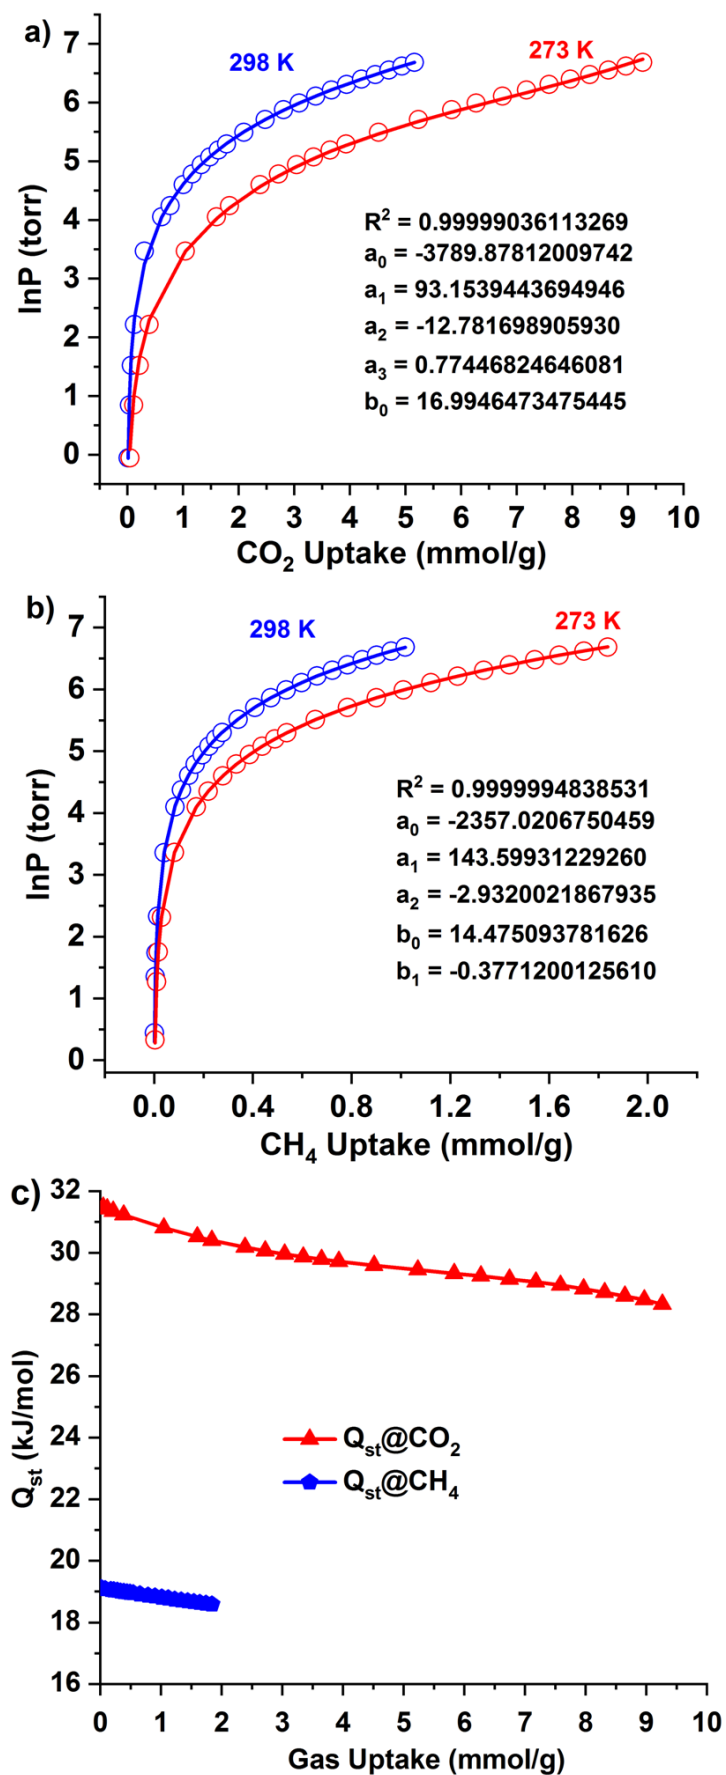

**Fig. S7** a-b) Details of Virial equation (symbols) fitting to the experimental  $\text{CO}_2$  and  $\text{CH}_4$  adsorption data (solid lines) for HNUST-9 collected at 273 K and 298 K; c) The  $\text{CO}_2$  and  $\text{CH}_4$  isosteric adsorption enthalpies of HNUST-9.

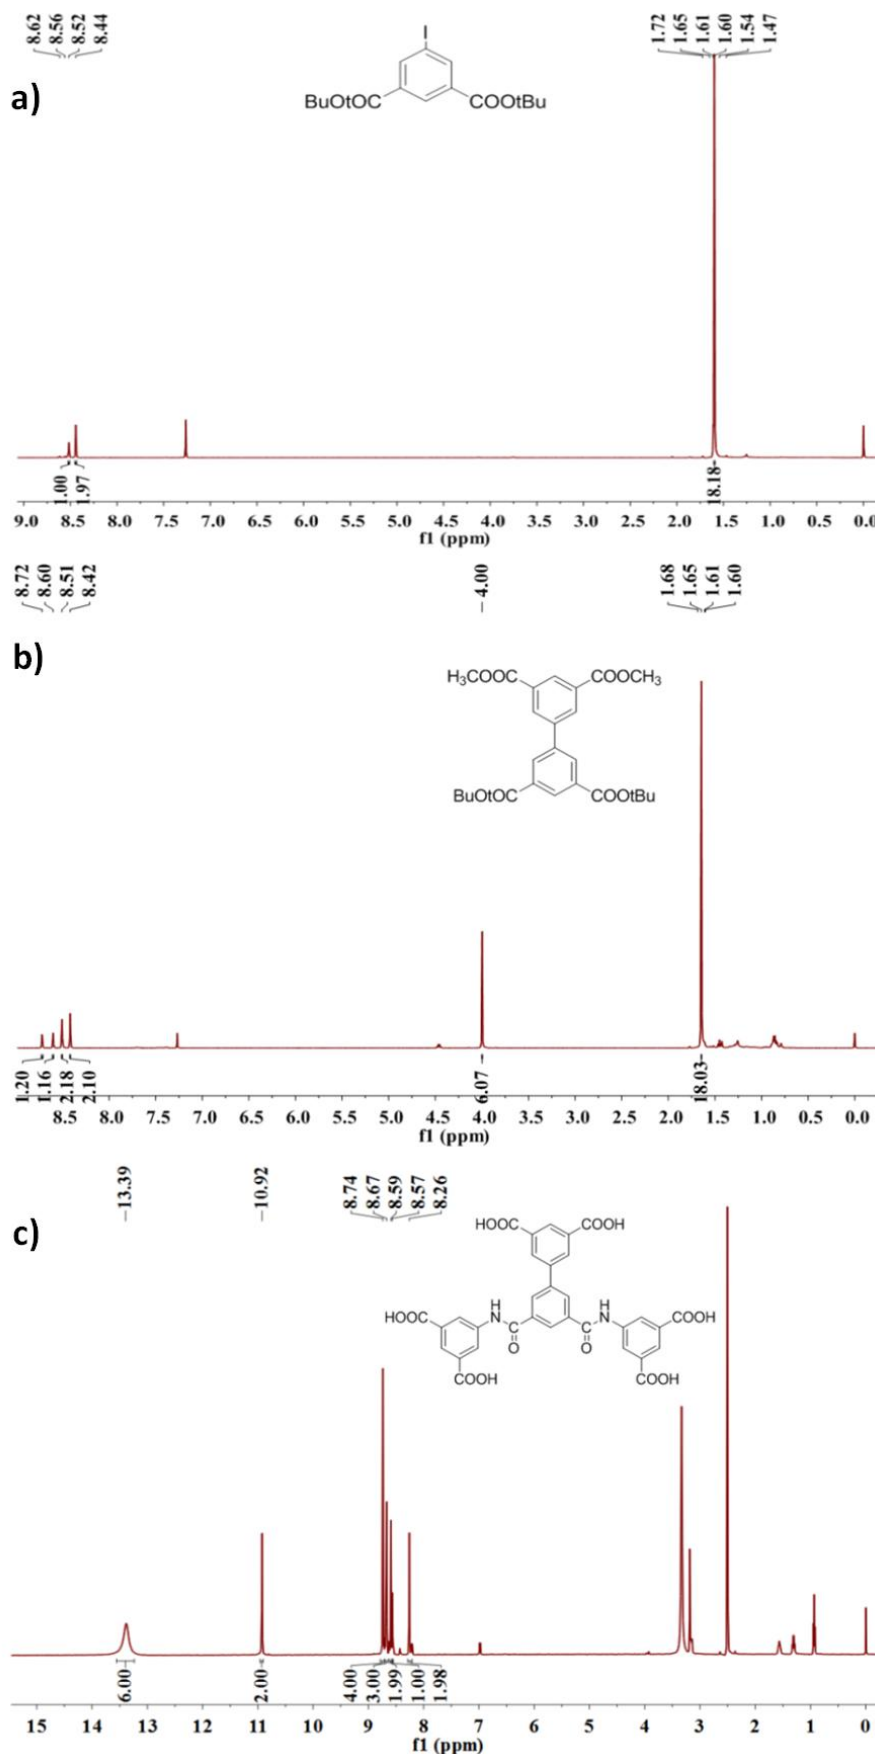

**Fig. S8** The <sup>1</sup>H NMR spectrum. a) Di-tert-butyl 5-iodoisophthalate in CDCl<sub>3</sub>; b) 3,5-di-tert-butyl 3',5'-dimethyl [1,1'-biphenyl]-3,3',5,5'-tetracarboxylate in CDCl<sub>3</sub>; c) H<sub>6</sub>DBDBD ligand in DMSO-*d*<sub>6</sub>, H<sub>6</sub>DBDBD = 5,5'-((3',5'-dicarboxy-[1,1'-biphenyl]-3,5-dicarbonyl)bis(azanediyl))diisophthalic acid.



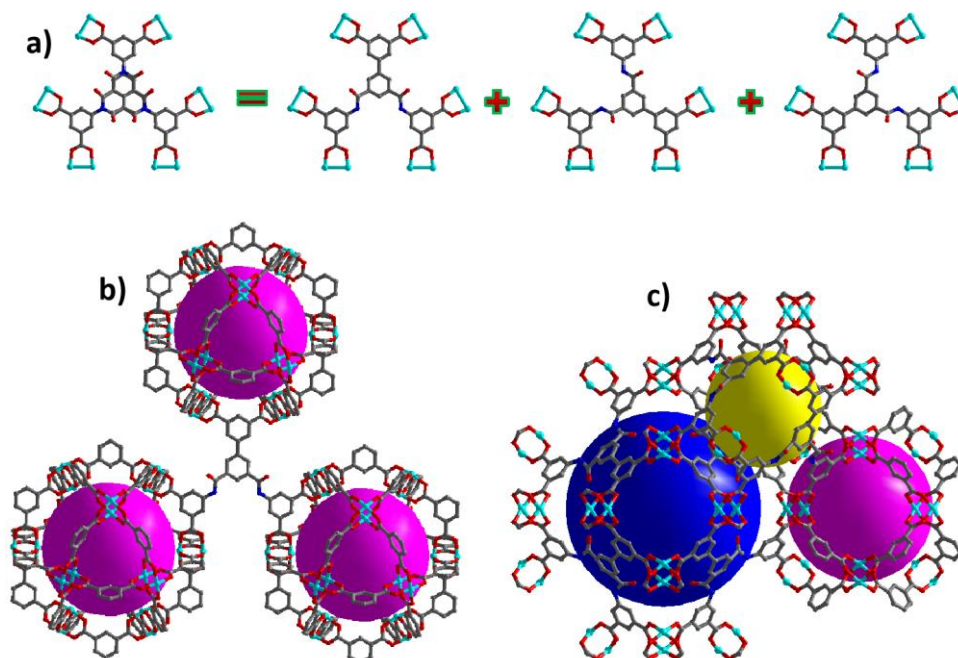

**Fig. S9** a) The acylamide and benzene moieties of the DBDBD ligand in the crystal structure of HNUST-9 are disordered over three positions with equal probability; b) A portion of structure of the (3, 24)-connected *rht*-type framework; c) The 3D polyhedra packing in single-crystal structure of HNUST-9. Water molecules and H atoms have been omitted for clarity.

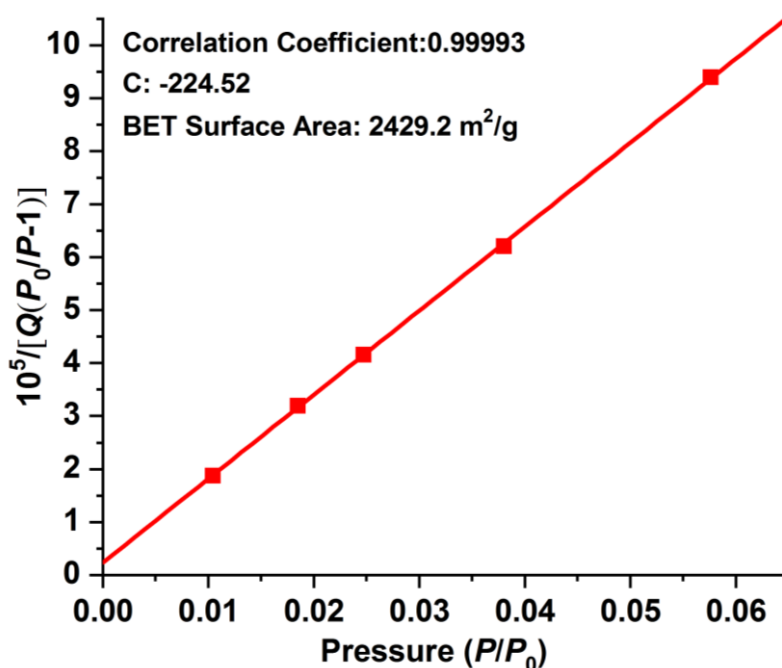

**Fig. S10** The BET plots for HNUST-9 in the chosen range ( $P/P_0 = 0.01-0.06$ ). This range was chosen according to two major criteria established in literatures [(a) J. Rouquerol, P. Llewellyn and F. Rouquerol, *Stud. Surf. Sci. Catal.*, **2007**, 160, 49-56; (b) K. S. Walton and R. Q. Snurr, *J. Am. Chem. Soc.*, **2007**, 129, 8552 -8556.]: (1) The pressure range selected should have values of  $Q(P_0-P)$  increasing with  $P/P_0$ . (2) The y intercept of the linear region must be positive to yield a meaningful value of the C parameter, which should be greater than zero.

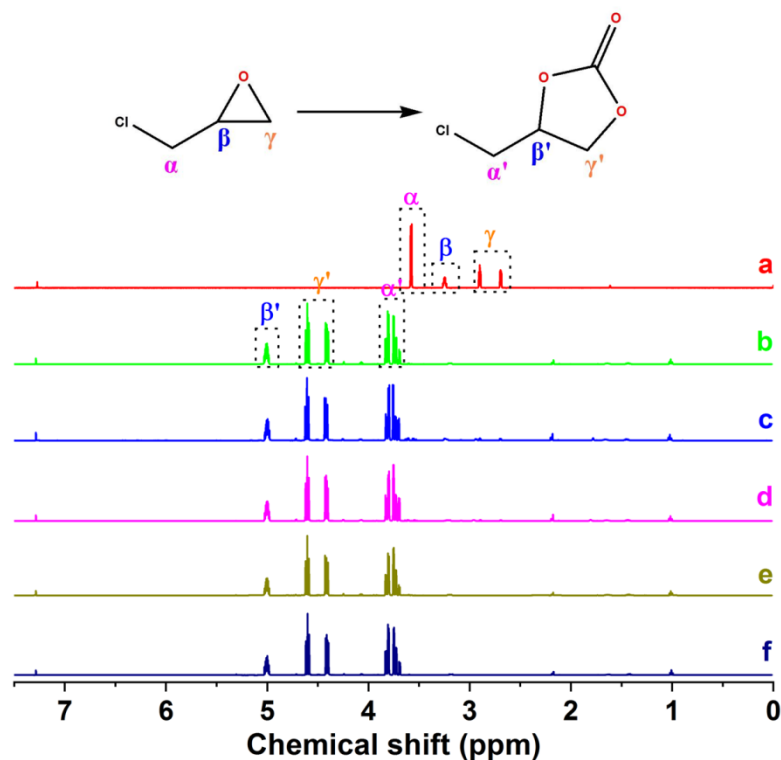

**Fig. S11** The  $^1\text{H}$  NMR spectrum (in  $\text{CDCl}_3$ ) of a solution after the cycloaddition of  $\text{CO}_2$  with 2-(chloromethyl)oxirane: a) without catalyst, b) first cycle, c) second cycle, d) third cycle, e) fourth cycle and f) fifth cycle. The yields of the reaction have been calculated by integration of cyclic carbonates protons at the end of the reaction, due to the distinct chemical shifts for the corresponding epoxide protons.

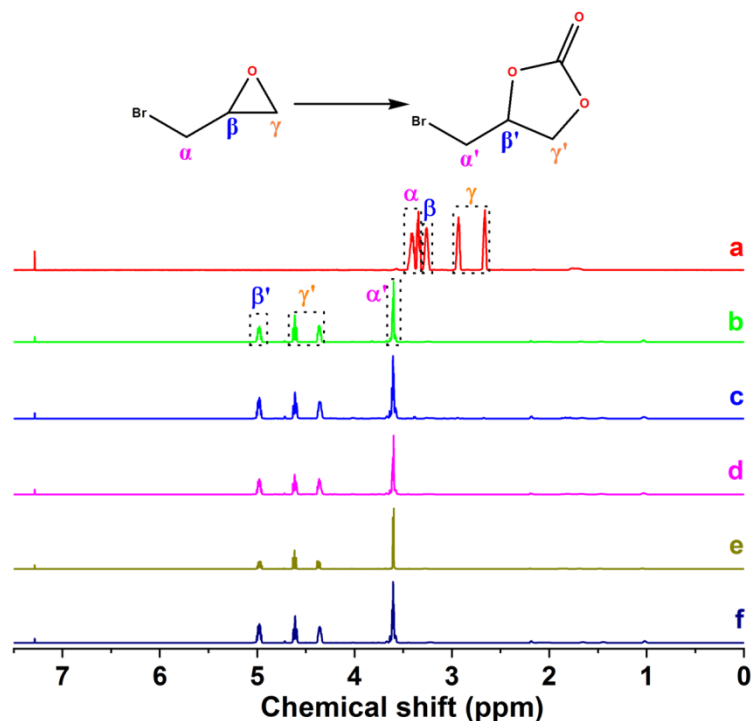

**Fig. S12** The  $^1\text{H}$  NMR spectrum (in  $\text{CDCl}_3$ ) of a solution after the cycloaddition of  $\text{CO}_2$  with 2-(bromomethyl)oxirane: a) without catalyst, b) first cycle, c) second cycle, d) third cycle, e) fourth cycle and f) fifth cycle.

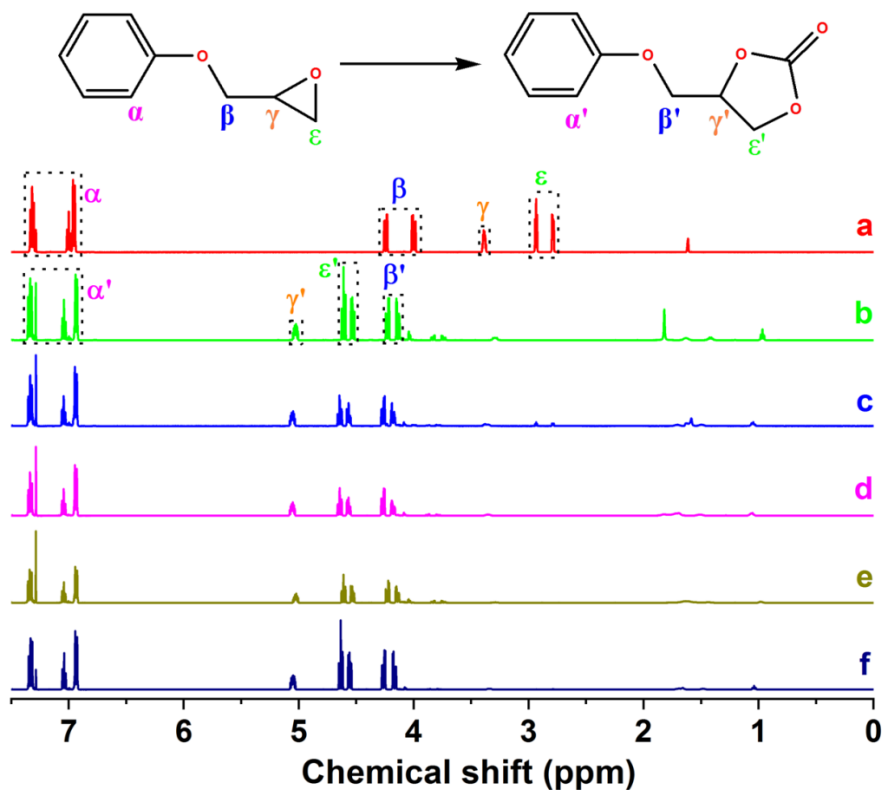

**Fig. S13** The <sup>1</sup>H NMR spectrum (in CDCl<sub>3</sub>) of a mixture after the cycloaddition of CO<sub>2</sub> with 2-(phenoxymethyl)oxirane: a) without catalyst, b) first cycle, c) second cycle, d) third cycle, e) fourth cycle and f) fifth cycle.

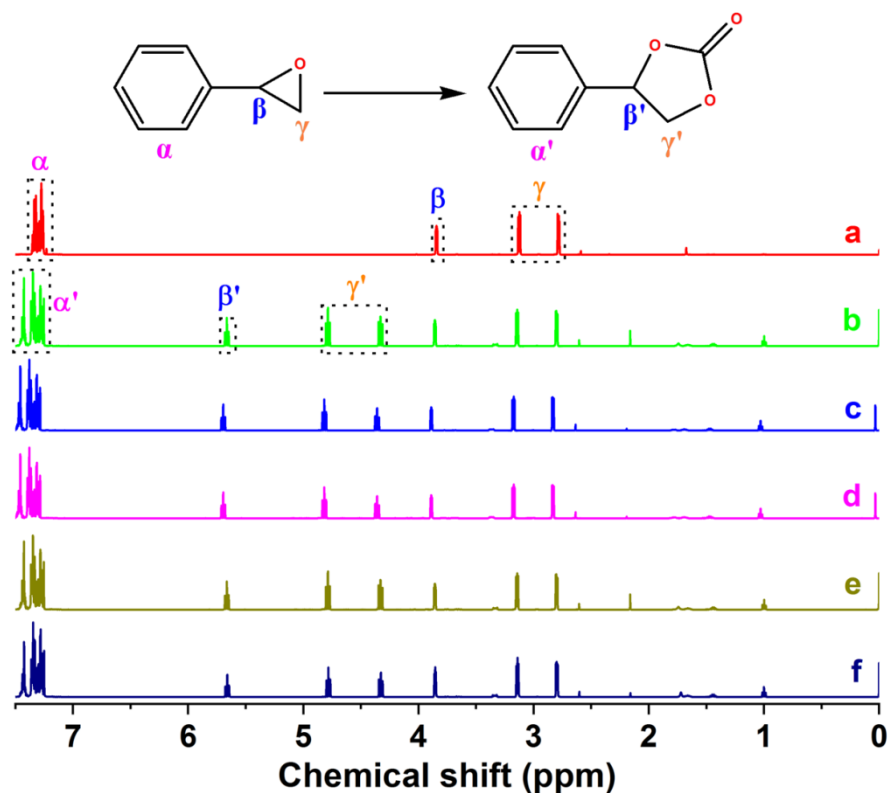

**Fig. S14** The <sup>1</sup>H NMR spectrum (in CDCl<sub>3</sub>) of a solution after the cycloaddition of CO<sub>2</sub> with 2-phenyloxirane: a) without catalyst, b) first cycle, c) second cycle, d) third cycle, e) fourth cycle and f) fifth cycle.

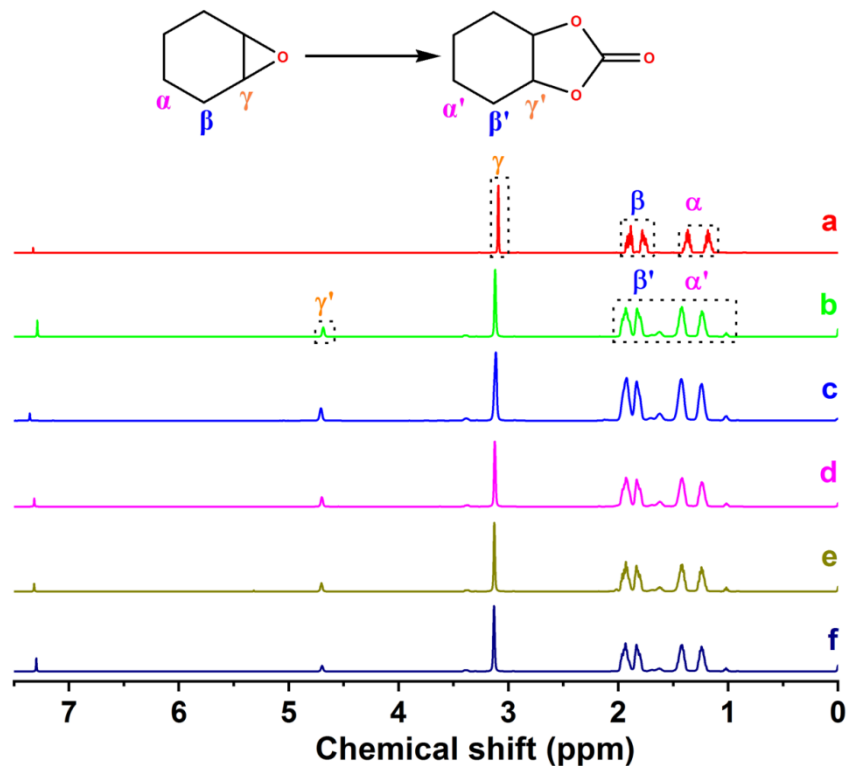

**Fig. S15** The  $^1\text{H}$  NMR spectrum (in  $\text{CDCl}_3$ ) of a solution after the cycloaddition of  $\text{CO}_2$  with cyclohexene oxide: a) without catalyst, b) first cycle, c) second cycle, d) third cycle, e) fourth cycle and f) fifth cycle.

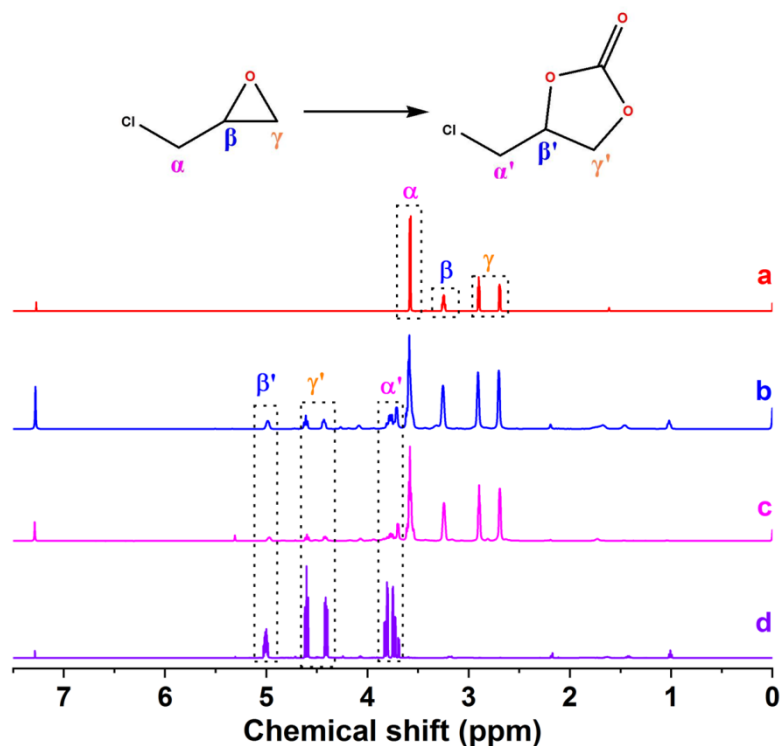

**Fig. S16** The  $^1\text{H}$  NMR spectrum (in  $\text{CDCl}_3$ ) of a solution after the controlled experiments for cycloaddition of  $\text{CO}_2$  with 2-(chloromethyl)oxirane. a) without catalyst, b) catalyzed by the cocatalyst TBAB alone, c) catalyzed by HNUST-9 only, d) catalyzed by both HNUST-9 and TBAB available at the same conditions.

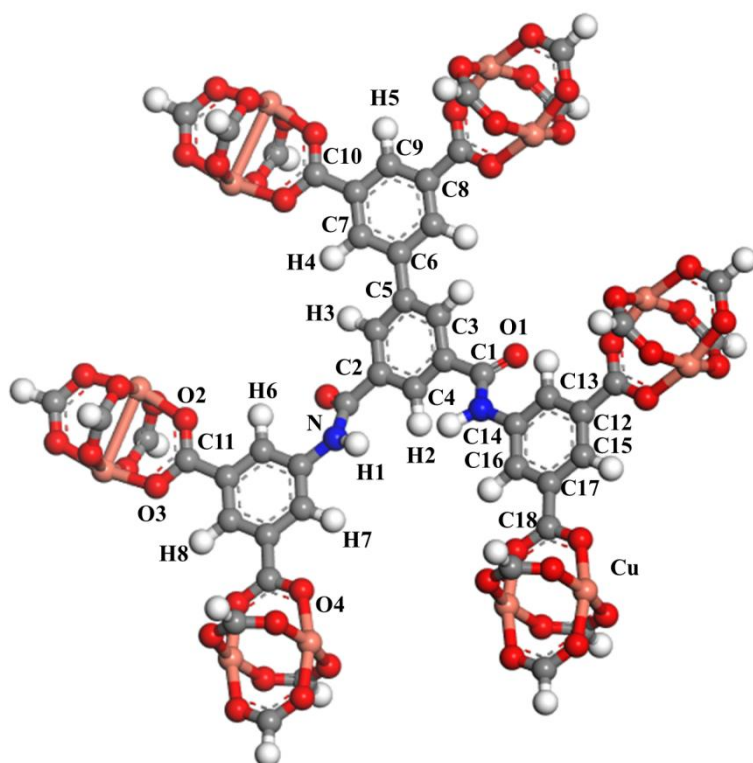

**Fig. S17** The atomic schemes in framework of HNUST-9 used for GCMC and First-principles calculations.

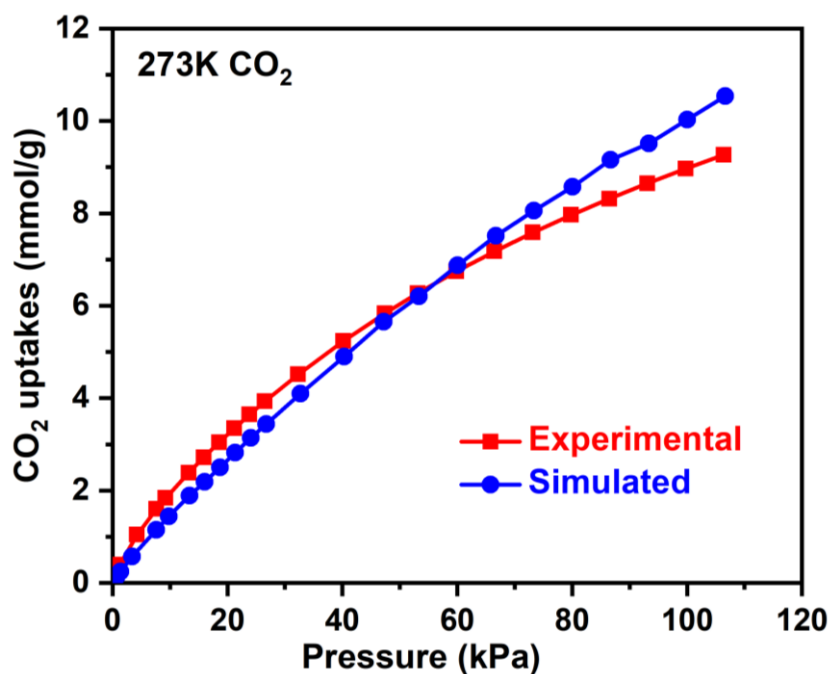

**Fig. S18** Comparison of CO<sub>2</sub> adsorption isotherms of HNUST-9 at 273 K up to 1 bar between GCMC simulated and experimental data.

**Table S1.** Crystal data and structure refinement for HNUST-9.

| Identification code               | HUNST-9                                                                        |
|-----------------------------------|--------------------------------------------------------------------------------|
| CCDC number                       | 1836745                                                                        |
| Empirical formula                 | C <sub>32</sub> H <sub>20</sub> Cu <sub>3</sub> N <sub>2</sub> O <sub>17</sub> |
| Formula weight                    | 895.14                                                                         |
| Temperature                       | 295(2) K                                                                       |
| Wavelength                        | 0.71073 Å                                                                      |
| Crystal system                    | Cubic                                                                          |
| Space group                       | Fm-3m                                                                          |
| Unit cell dimensions.             | $a = b = c = 40.209(9)$ Å, $\alpha = \beta = \gamma = 90^\circ$                |
| Volume                            | 65010(44) Å <sup>3</sup>                                                       |
| Z                                 | 32                                                                             |
| Density (calculated)              | 0.732 g cm <sup>3</sup>                                                        |
| Absorption coefficient            | 0.813 mm <sup>-1</sup>                                                         |
| F(000)                            | 14368.0                                                                        |
| Crystal size                      | 0.25 × 0.23 × 0.20 mm <sup>3</sup>                                             |
| 2theta range for data collection  | 4.416 to 50.714                                                                |
| Limiting indices                  | -43 ≤ h ≤ 48, -48 ≤ k ≤ 42, -48 ≤ l ≤ 48                                       |
| Reflections collected / unique    | 154811/2940 [R <sub>int</sub> = 0.1442]                                        |
| Completeness                      | 99.5% (2theta = 52.00 °)                                                       |
| Absorption correction             | Semi-empirical from equivalents                                                |
| Refinement method                 | Full-matrix least-squares on F <sup>2</sup>                                    |
| Data / restraints / parameters    | 2940/89/123                                                                    |
| Goodness-of-fit on F <sup>2</sup> | 1.189                                                                          |
| Final R indices [I > 2σ(I)]       | R <sub>1</sub> = 0.0815, wR <sub>2</sub> <sup>a</sup> = 0.2444                 |
| R indices (all data)              | R <sub>1</sub> = 0.1035, wR <sub>2</sub> <sup>a</sup> = 0.2802                 |
| Largest diff. peak and hole       | 1.41/-0.74 e. Å <sup>-3</sup>                                                  |

$$^a R_1 = \frac{\sum ||F_o| - |F_c||}{\sum |F_o|}; wR_2 = \left[ \frac{\sum w(\sum F_o^2 - F_c^2)^2}{\sum w(F_o^2)^2} \right]^{1/2}.$$

**Table S2.** Lennard-Jones parameters of HNUST-9

| Atom Type | $\epsilon/k_B$ (K) | $\sigma$ (Å) | Atom Type | $\epsilon/k_B$ (K) | $\sigma$ (Å) |
|-----------|--------------------|--------------|-----------|--------------------|--------------|
| H         | 22.141             | 2.571        | C         | 52.836             | 3.431        |
| O         | 30.192             | 3.118        | N         | 34.721             | 3.261        |
| Cu        | 2.516              | 3.114        |           |                    |              |

**Table S3.** Lennard-Jones parameters and charges of adsorbates

| Atom Type | $\epsilon/k_B$ (K) | $\sigma$ (Å) | $q$ (e) |
|-----------|--------------------|--------------|---------|
| CO2_O     | 80.507             | 3.033        | -0.3256 |
| CO2_C     | 28.129             | 2.757        | 0.6512  |

**Table S4.** All partial atomic charges for the MOF material HNUST-9 used in GCMC simulations.

| Atom Type | $q$ (e) | Atom Type | $q$ (e) |
|-----------|---------|-----------|---------|
| C1        | 0.698   | C10       | 0.786   |
| C2        | -0.077  | C11       | 0.810   |
| C3        | -0.107  | C12       | 0.439   |
| C4        | -0.109  | C13       | -0.216  |
| C5        | 0.087   | C14       | -0.028  |
| C6        | 0.027   | C15       | 0.247   |
| C7        | 0.079   | C16       | -0.107  |
| C8        | -0.071  | C17       | -0.045  |
| C9        | -0.048  | C18       | 0.820   |
| H1        | 0.319   | H5        | 0.114   |
| H2        | 0.097   | H6        | 0.178   |
| H3        | 0.101   | H7        | 0.165   |
| H4        | 0.112   | H8        | 0.124   |
| O1        | -0.511  | O3        | -0.679  |
| O2        | -0.700  | O4        | -0.713  |
| N         | -0.720  | Cu        | 1.076   |
